# Supplementary material for: Covid-19 mobility restrictions: impacts on urban air quality and health
Source: PubMed Central journal article supplement (PMC7611887; doi:10.5334/bc.124), 2021-09-02
Supplement: EMS137022-supplement-Supplementary_Material.pdf [file EMS137022-supplement-Supplementary_Material.pdf]

Mohajeri, N., Walch, W., Gudmundsson, A., Heaviside, C., Askari, S., Wilkinson, P. & Davies, M. (2021) Covid-19 mobility restrictions: impacts on urban air quality and health. *Buildings & Cities*.

## Supplemental data

### Appendix A Historical and year 2020 weather data

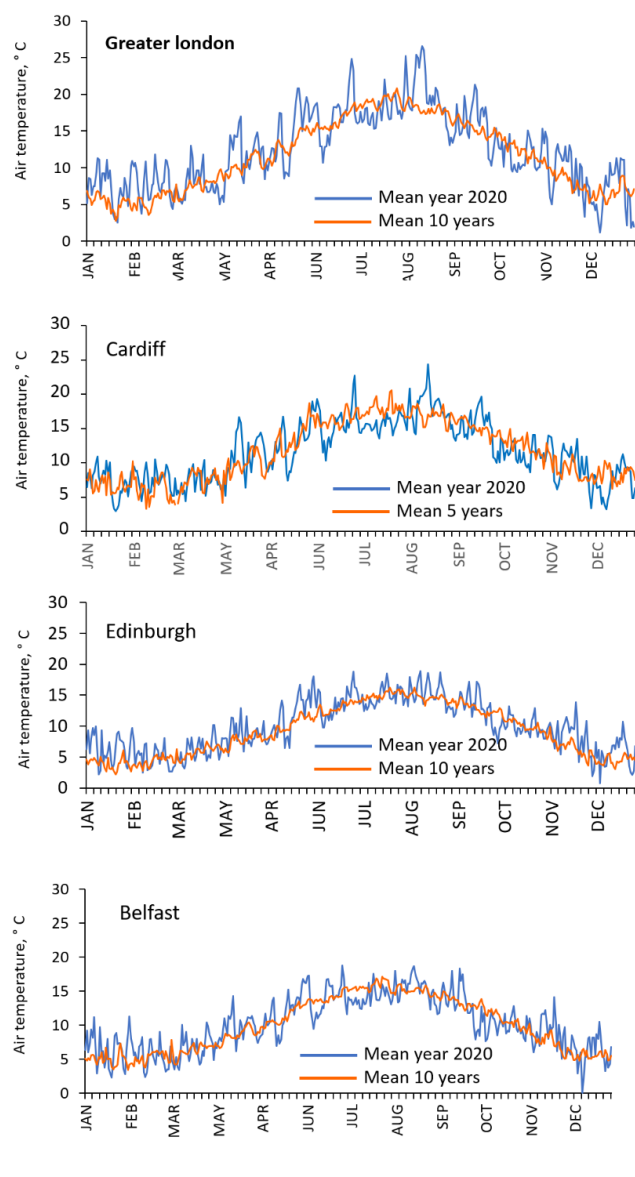

**Figure S1.** Mean daily temperature (°C) for the year 2020 and the previous 10 years (2010-2019) for 4 cities in the study

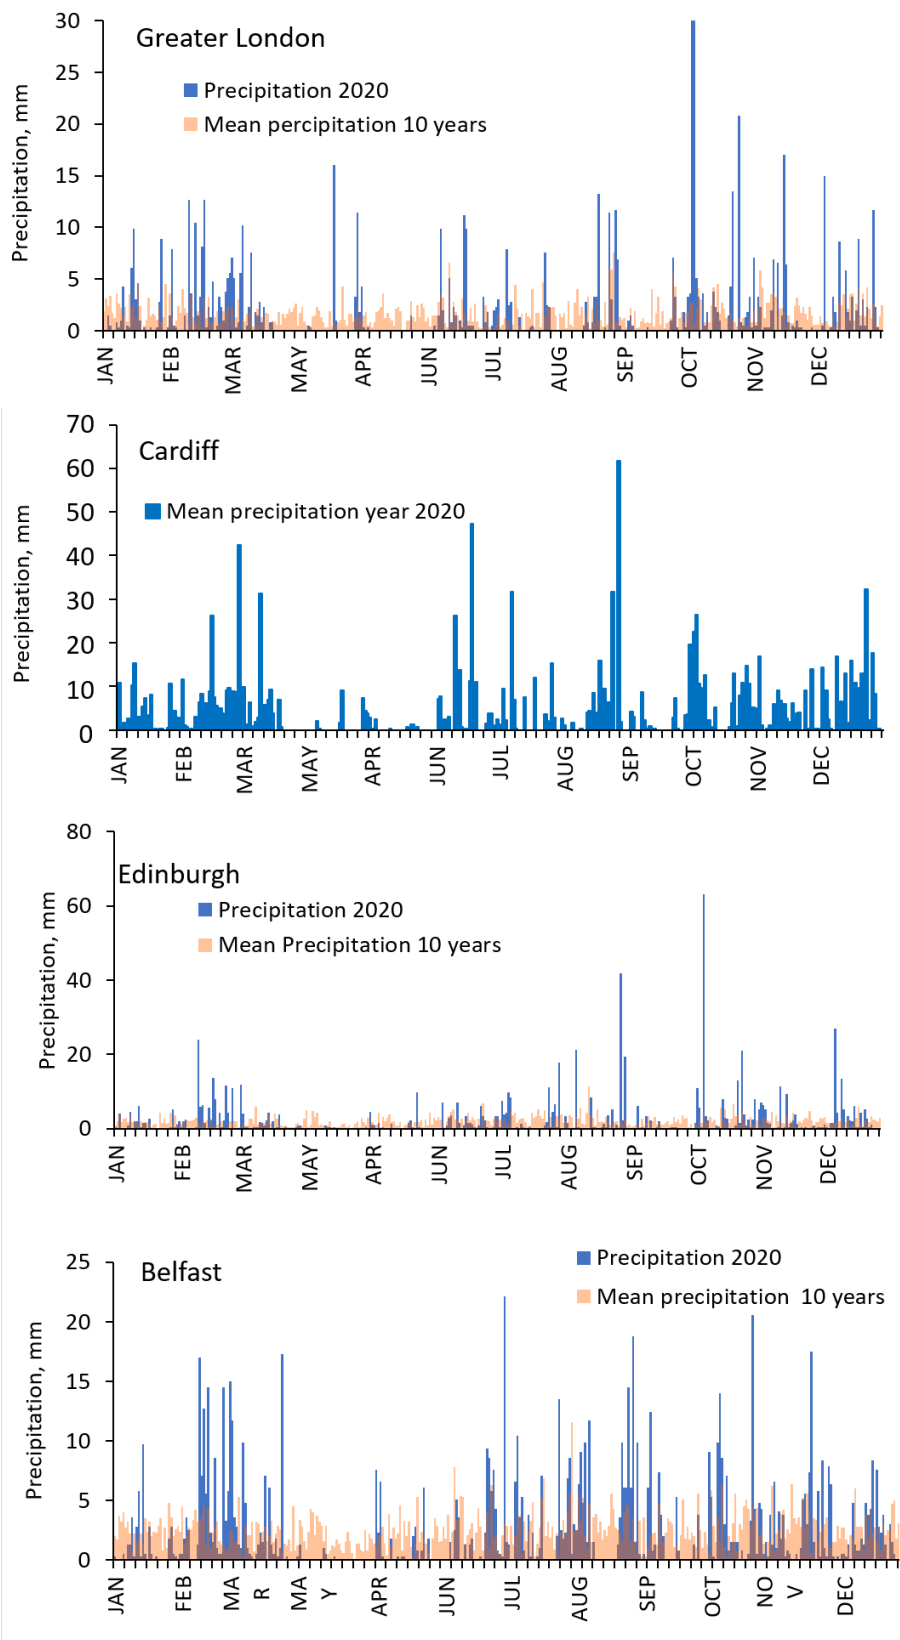

**Figure S2.** Mean daily precipitation (mm) for the year 2020 and the previous 10 years (2010-2019) for 4 cities in the study

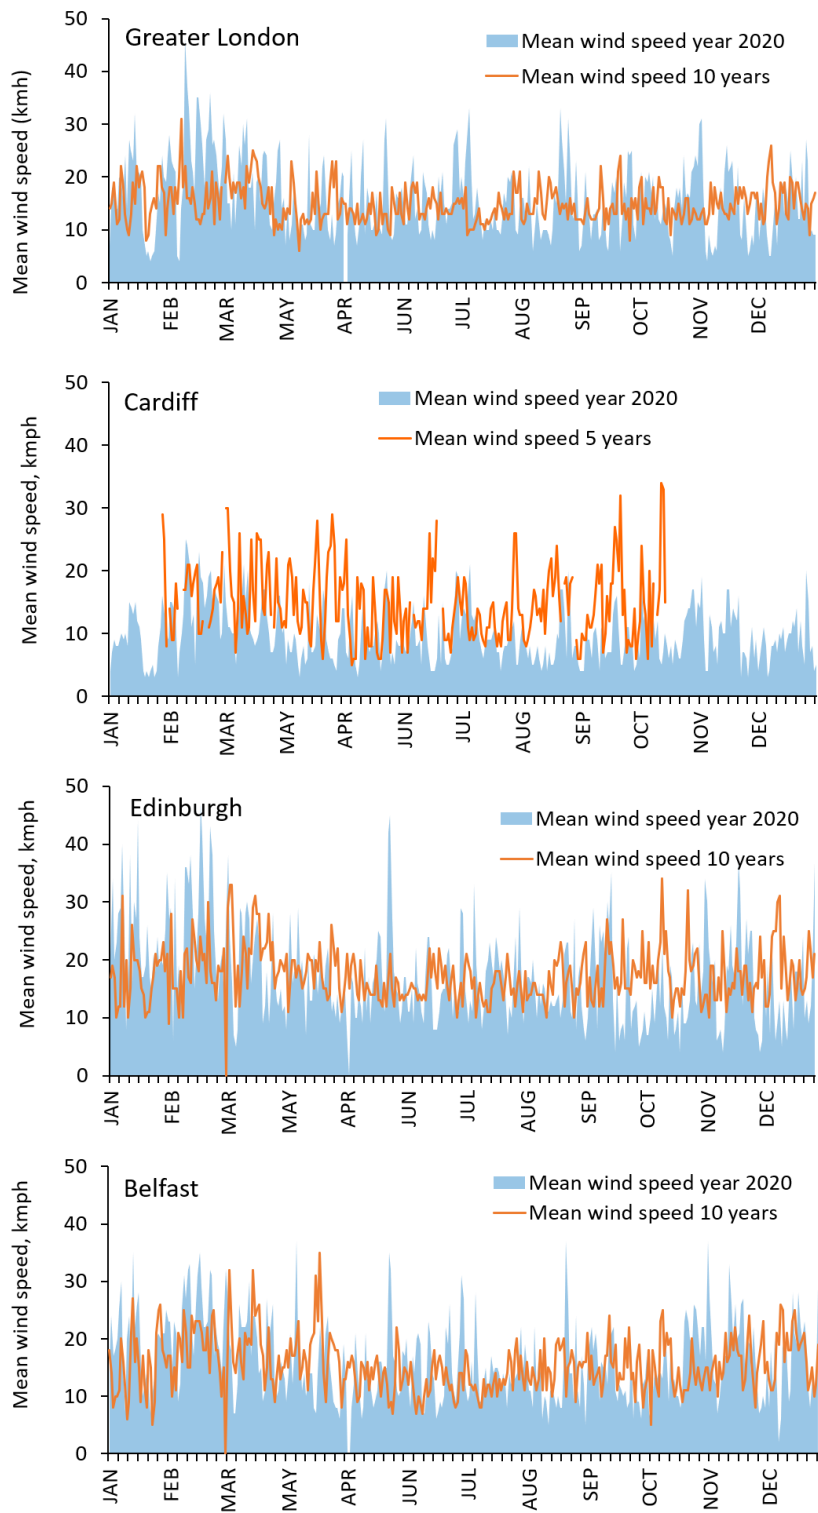

**Figure S3.** Mean daily wind speed (in kmph) for the year 2020 and the previous 10 years (2010-2019) for 4 cities in the study

## Appendix B

### Feature importance for weather-corrected Machine Learning model

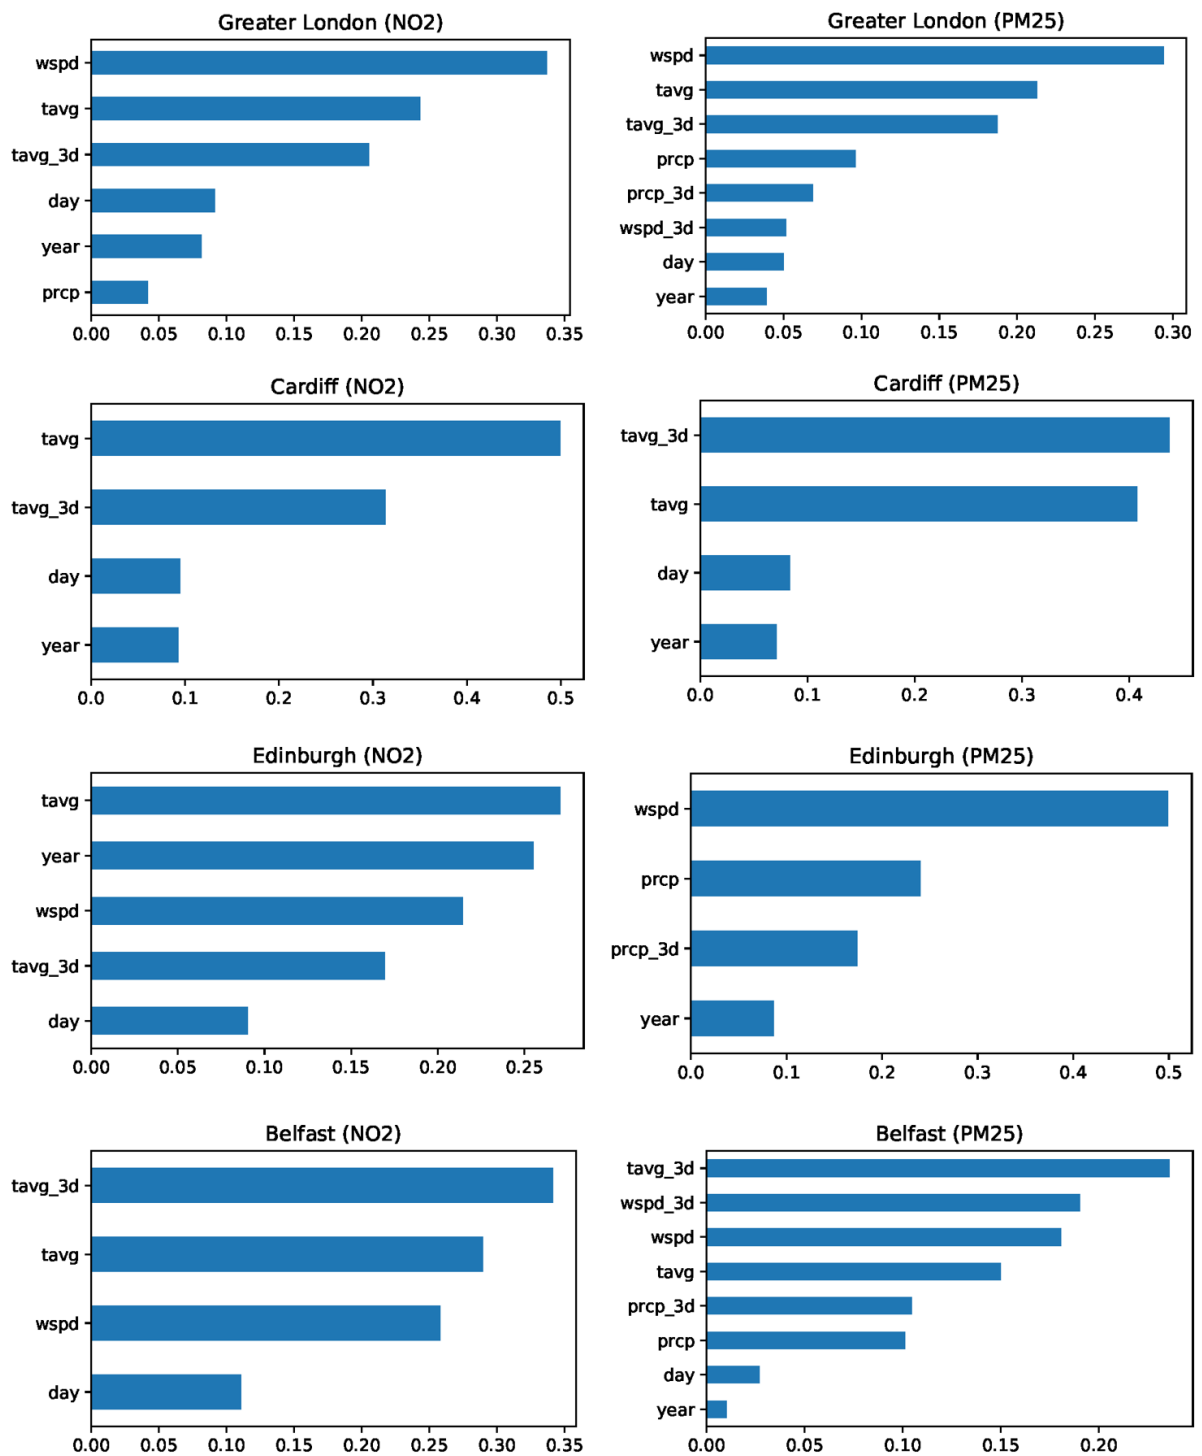

**Figure S4.** Feature importance for weather corrected Machine Learning models for each city and for NO<sub>2</sub> and PM<sub>2.5</sub>

## Appendix C

### Changes in the ground-level NO<sub>2</sub> and PM<sub>2.5</sub> concentrations (for urban background stations)

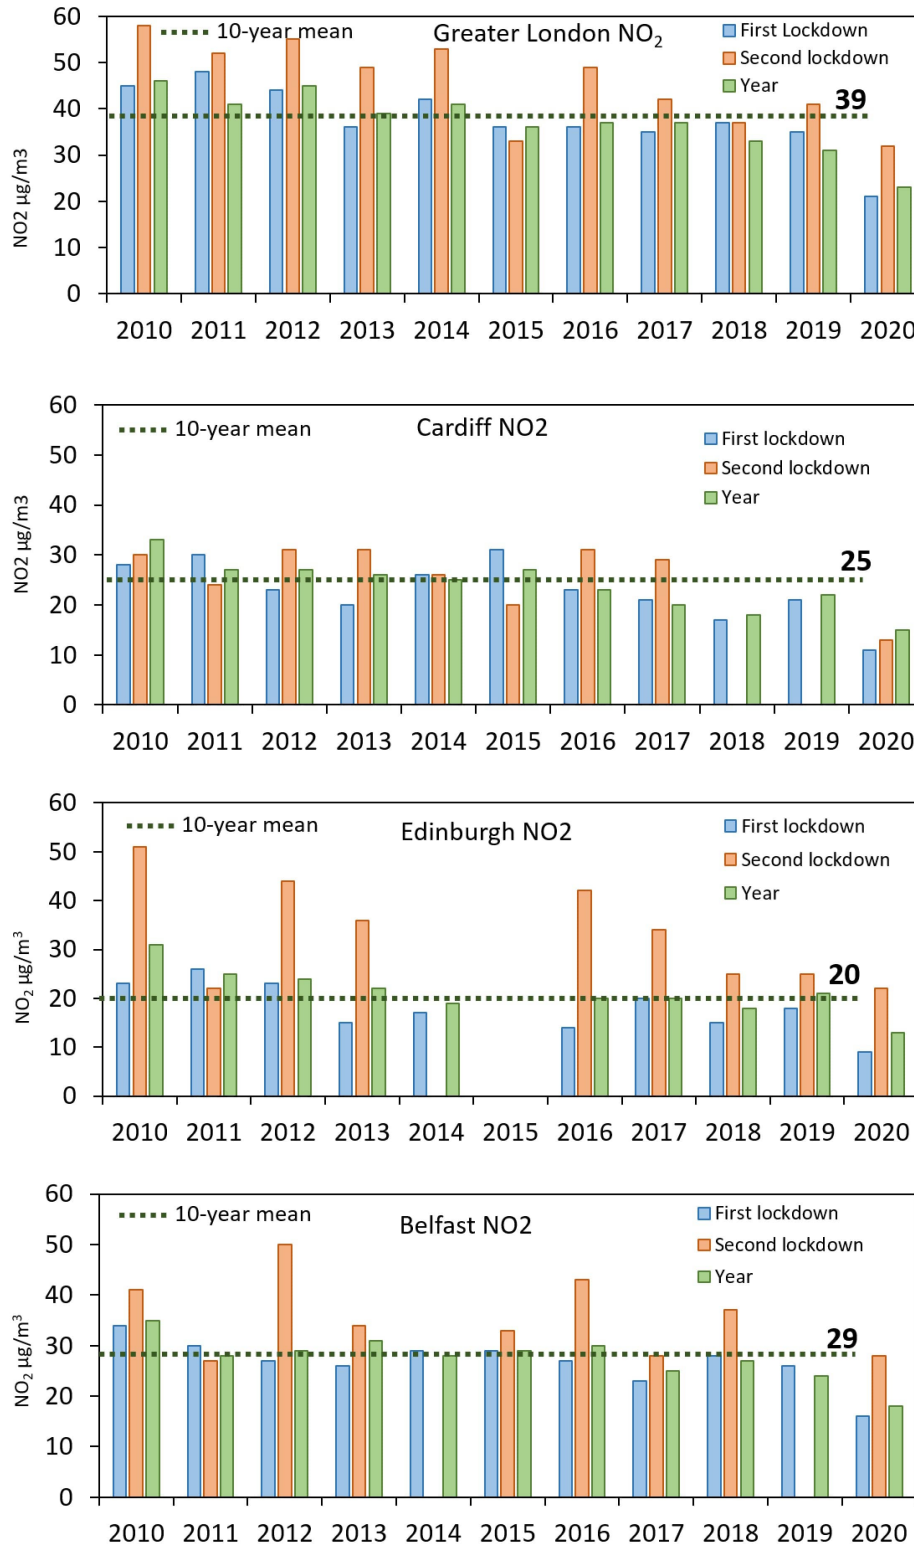

**Figure S5.** Comparison between yearly average concentration of NO<sub>2</sub> for urban background stations for each city and for the two lockdown periods. Dashed lines show the 10-year average (2010-2019).

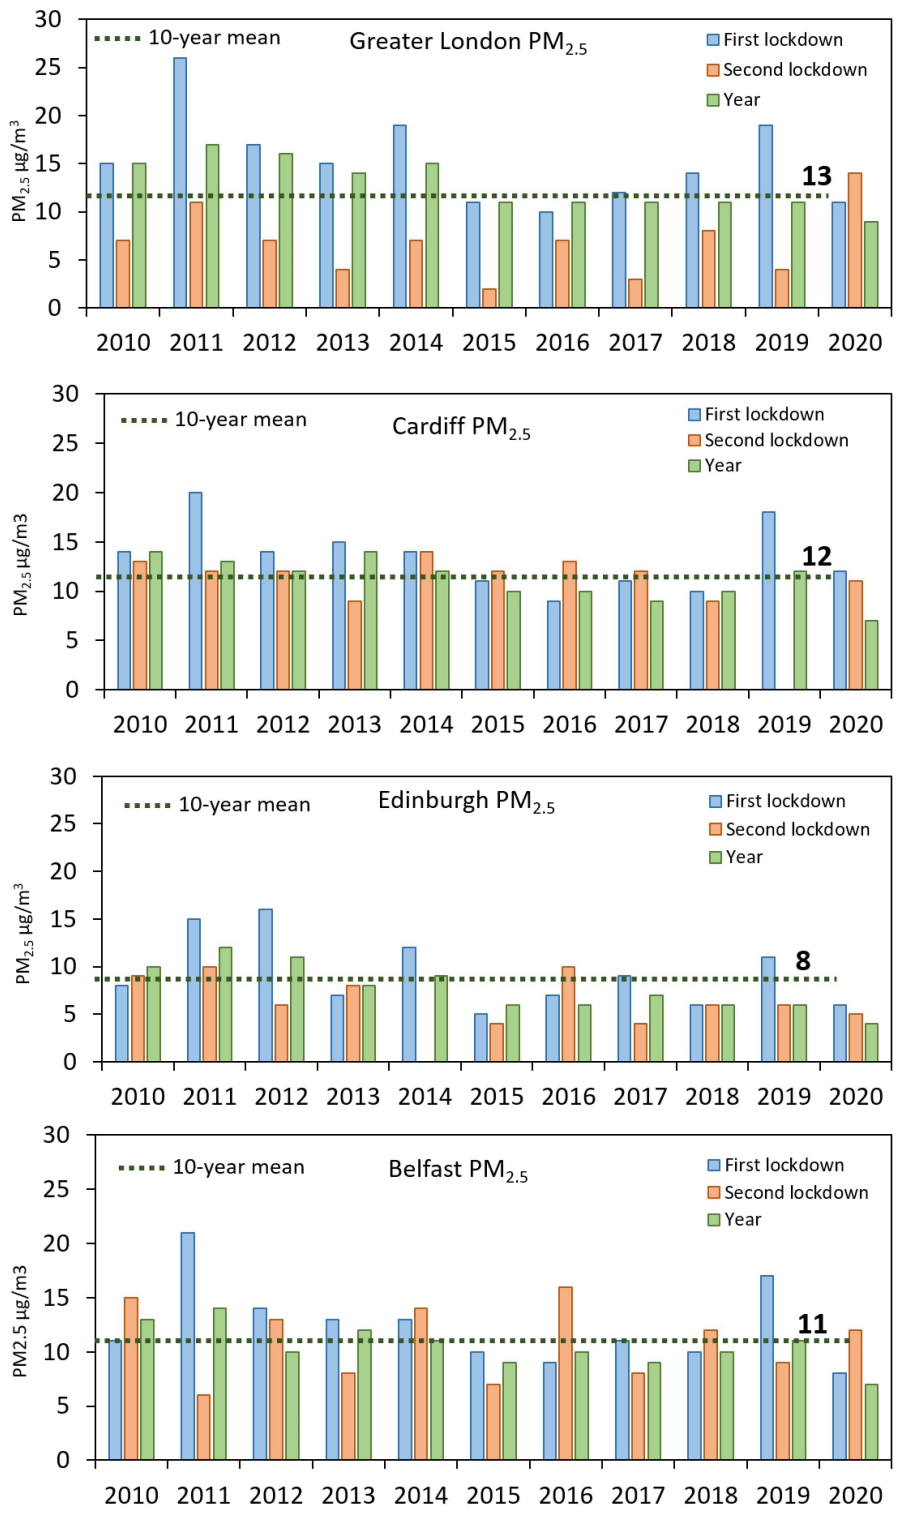

**Figure S6.** Comparison between yearly average concentration of PM<sub>2.5</sub> for urban background stations for each city and for the two lockdown periods. Dashed lines show the 10-year average (2010-2019).
